# Supplementary material for: Identification and Functional Assignment of Genes Implicated in Sperm Maturation of Tibetan Sheep
Source: MDPI journal article supplement (doi:10.3390/ani13091553), 2023-05-06
Supplement: s1 [file s1]

**Table S2. Summary of read numbers aligned onto the sheep reference genome.**

| Sample  | Total    | Unmapped (%)     | Unique_Mapped (%) | Multiple_Mapped (%) | Total_Mapped (%)  |
|---------|----------|------------------|-------------------|---------------------|-------------------|
| Cp-1Y-1 | 62514808 | 7274698 (11.64%) | 52360674 (83.76%) | 2879436 (4.61%)     | 55240110 (88.36%) |
| Cp-1Y-2 | 51423816 | 5928112 (11.53%) | 43054539 (83.72%) | 2441165 (4.75%)     | 45495704 (88.47%) |
| Cp-1Y-3 | 42833866 | 5277105 (12.32%) | 35661218 (83.25%) | 1895543 (4.43%)     | 37556761 (87.68%) |
| Cp-1Y-4 | 44006918 | 5066313 (11.51%) | 37026148 (84.14%) | 1914457 (4.35%)     | 38940605 (88.49%) |
| Cp-3M-1 | 64756588 | 7452496 (11.51%) | 53193684 (82.14%) | 4110408 (6.35%)     | 57304092 (88.49%) |
| Cp-3M-2 | 52551240 | 6084114 (11.58%) | 43384027 (82.56%) | 3083099 (5.87%)     | 46467126 (88.42%) |
| Cp-3M-3 | 56791208 | 6206144 (10.93%) | 47084879 (82.91%) | 3500185 (6.16%)     | 50585064 (89.07%) |
| Cp-3M-4 | 43496810 | 4710161 (10.83%) | 36338012 (83.54%) | 2448637 (5.63%)     | 38786649 (89.17%) |
| Cr-1Y-1 | 58521938 | 6645135 (11.35%) | 48925020 (83.60%) | 2951783 (5.04%)     | 51876803 (88.65%) |
| Cr-1Y-2 | 49913278 | 5688678 (11.40%) | 41375669 (82.90%) | 2848931 (5.71%)     | 44224600 (88.60%) |
| Cr-1Y-3 | 54881564 | 6316124 (11.51%) | 45671874 (83.22%) | 2893566 (5.27%)     | 48565440 (88.49%) |
| Cr-1Y-4 | 59426474 | 6548401 (11.02%) | 49731776 (83.69%) | 3146297 (5.29%)     | 52878073 (88.98%) |
| Cr-3M-1 | 53288852 | 6539519 (12.27%) | 43472815 (81.58%) | 3276518 (6.15%)     | 46749333 (87.73%) |
| Cr-3M-2 | 59370152 | 7629424 (12.85%) | 48340956 (81.42%) | 3399772 (5.73%)     | 51740728 (87.15%) |
| Cr-3M-3 | 40833528 | 5263799 (12.89%) | 33403273 (81.80%) | 2166456 (5.31%)     | 35569729 (87.11%) |
| Cr-3M-4 | 53387928 | 6404579 (12.00%) | 44167474 (82.73%) | 2815875 (5.27%)     | 46983349 (88.00%) |
| Cu-1Y-1 | 47851492 | 6133777 (12.82%) | 39532932 (82.62%) | 2184783 (4.57%)     | 41717715 (87.18%) |
| Cu-1Y-2 | 47950258 | 5551004 (11.58%) | 40104196 (83.64%) | 2295058 (4.79%)     | 42399254 (88.42%) |
| Cu-1Y-3 | 56745986 | 6527005 (11.50%) | 47448971 (83.62%) | 2770010 (4.88%)     | 50218981 (88.50%) |
| Cu-1Y-4 | 55732240 | 6153554 (11.04%) | 47050498 (84.42%) | 2528188 (4.54%)     | 49578686 (88.96%) |
| Cu-3M-1 | 46813082 | 5589854 (11.94%) | 38620217 (82.50%) | 2603011 (5.56%)     | 41223228 (88.06%) |
| Cu-3M-2 | 42502660 | 4774938 (11.23%) | 35173597 (82.76%) | 2554125 (6.01%)     | 37727722 (88.77%) |
| Cu-3M-3 | 45209036 | 4860421 (10.75%) | 37820107 (83.66%) | 2528508 (5.59%)     | 40348615 (89.25%) |
| Cu-3M-4 | 56578100 | 6364218 (11.25%) | 47040229 (83.14%) | 3173653 (5.61%)     | 50213882 (88.75%) |

Note: Cp, Cr, and Cu denote the caput, corpus and cauda epididymis, respectively; 3M and 1Y indicate three-month-old and one-year-old, respectively.
