# Supplementary material for: Identification and Functional Assignment of Genes Implicated in Sperm Maturation of Tibetan Sheep
Source: MDPI journal article supplement (doi:10.3390/ani13091553), 2023-05-06
Supplement: s1 [file s1]

**Table S1.** Primer information of mRNAs and miRNAs used for qPCR.

| Gene name      | Primer sequence-Forward (5'-3') | Primer sequence-Reverse (5'-3') | Accession no.  | Amplicon (bp) |
|----------------|---------------------------------|---------------------------------|----------------|---------------|
| NPC2           | GAATGTGAGCCCATGTCCCA            | CCATGTACCACAGCCTTGCT            | XM_012182049.3 | 117           |
| PAX2           | GTTGTGACCGGTCGTGACAT            | TGCTGAATCTCCAAGCCTCG            | NM_001178052.1 | 184           |
| PRDX6          | TCGGGACTTTACCCCAGTGT            | CTGTGGGCTCTTCACCATTG            | NM_001280704.1 | 167           |
| ADAM7          | AGCAAGTTCAAAGCCCACCT            | TGGTTCTTCGCTGCTGATGT            | XM_042243125.1 | 129           |
| AQP9           | GTAGCAGCCACCATGTTTCCT           | ATTCCCAGAGAGGAGGCGAT            | XM_004010567.5 | 131           |
| GJA1           | TGCCAATGTGGACATGCACT            | AAGAAGGCCACCTCGAAGAC            | XM_004011159.5 | 150           |
| ELSPBP1        | GCAGCAGTGGAAATACTGCG            | CCATGTTCTCCGTGGTTGGA            | XM_027978548.2 | 152           |
| CLDN7          | CCGTTGGTCCCCATGAATGT            | CAGCTTTGCTCTCACTCCCA            | NM_001185018.1 | 130           |
| HSPA2          | TCGGAAGATGAGGCCAATCG            | CGCTAATCTTGCCCCTCAGT            | XM_004010719.5 | 112           |
| ODF1           | TGACGTACTCCTACGGGCTC            | AACCGGCTCCCACAAGGATA            | XM_004011803.5 | 199           |
| GLB1           | CTGAACGCCATCCAGACGTA            | CTCCAACAGCCAAGCAGGTA            | XM_015102219.3 | 195           |
| GPX5           | AATGTGGCCACCTATTGTGGT           | TGGTTACACGGAAATCCCAACA          | NM_001267883.1 | 107           |
| $\beta$ -actin | ATATTGCTGCGCTCGTGGTT            | GTTGGTGACAATGCCGTGCT            | NM_001009784.3 | 224           |
